# Supplementary material for: WISP1 Is a Marker of Systemic and Adipose Tissue Inflammation in Dysmetabolic Subjects With or Without Type 2 Diabetes
Source: PubMed Central journal article supplement — J Endocr Soc. 2017 Apr 18;1(6):660–70. doi: 10.1210/js.2017-00108 (PMC5686652; doi:10.1210/js.2017-00108), 2017-04-18
Supplement: js-01-660-sd3.pdf [file js-01-660-sd3.pdf]

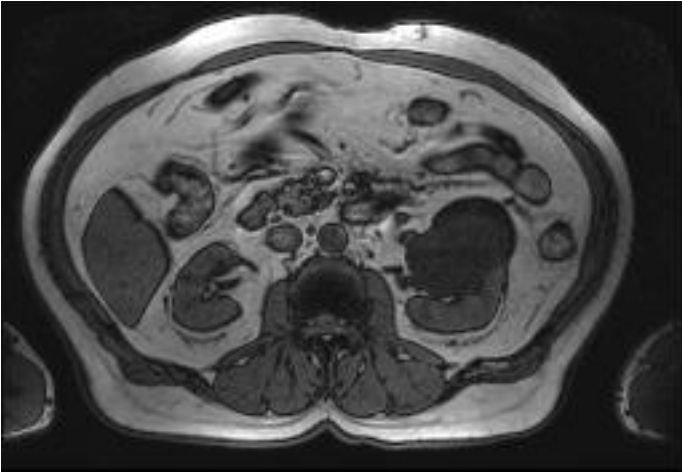

Patient #1- a

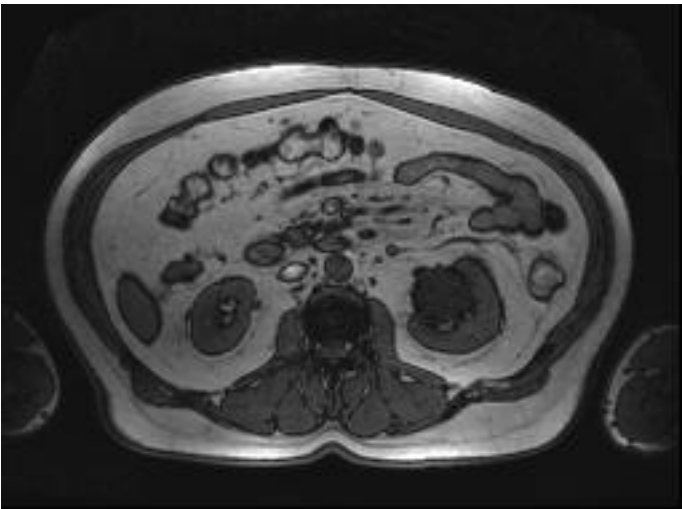

Patient #1- b

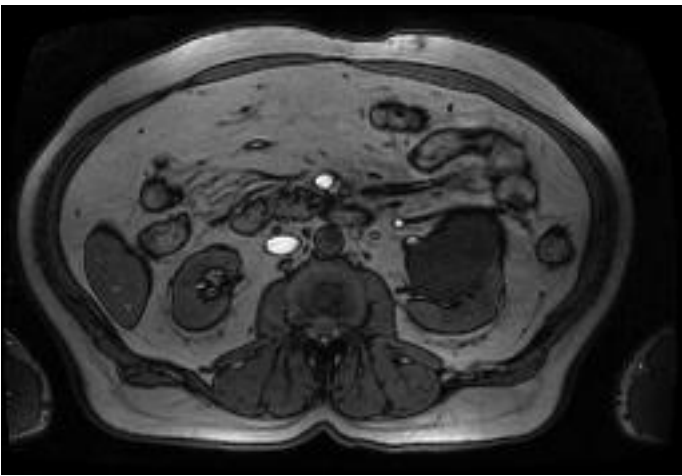

Patient #1- c

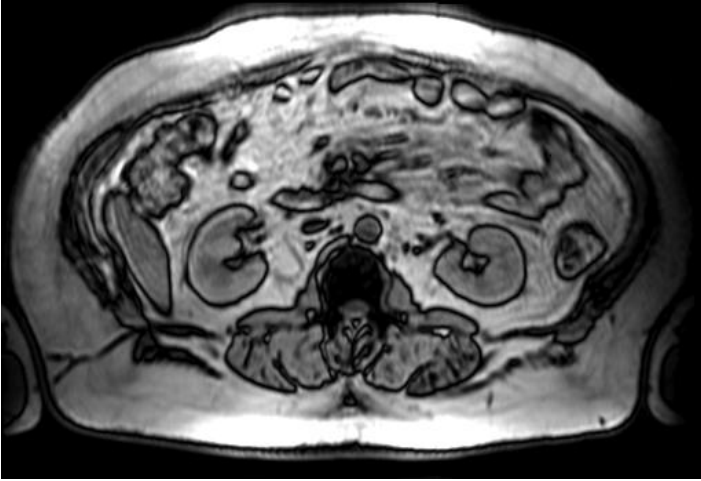

Patient #2 - a

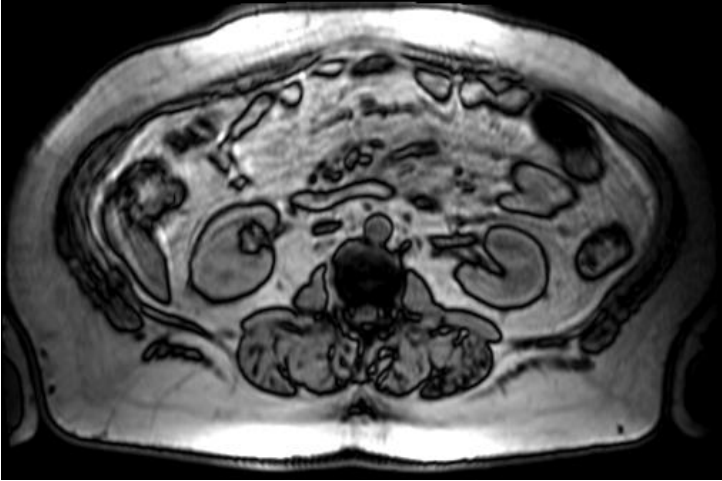

Patient #2 - b

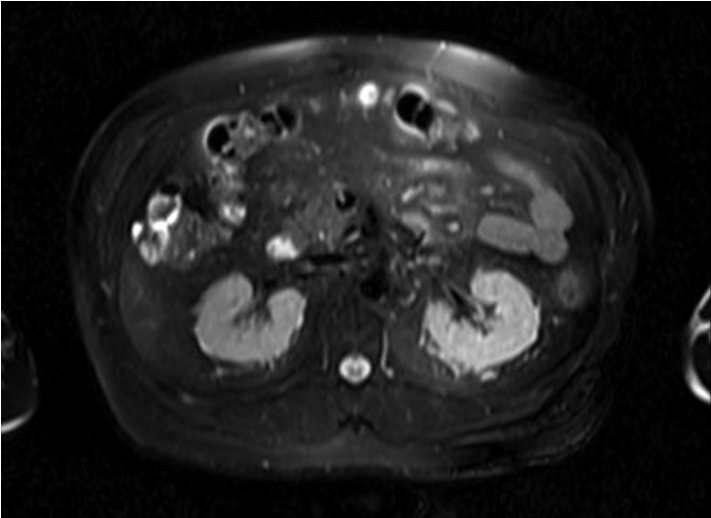

Patient #3 - a

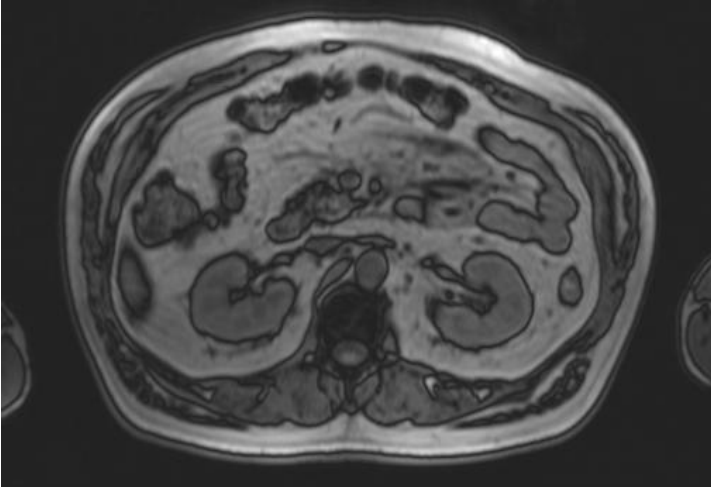

Patient #3 – b

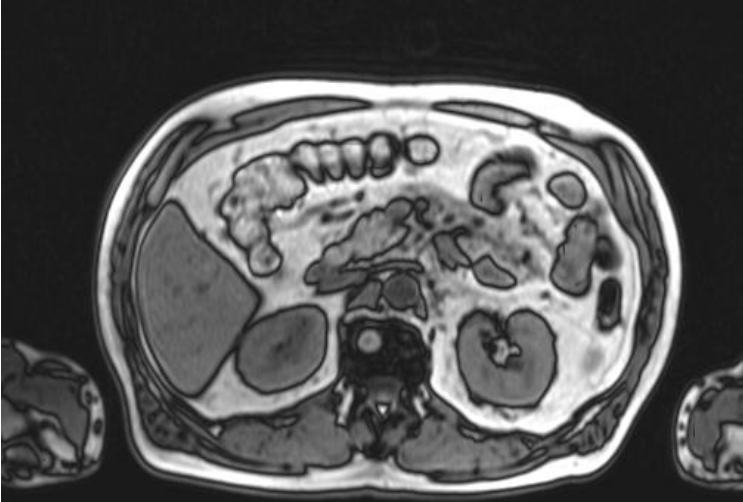

Patient #4

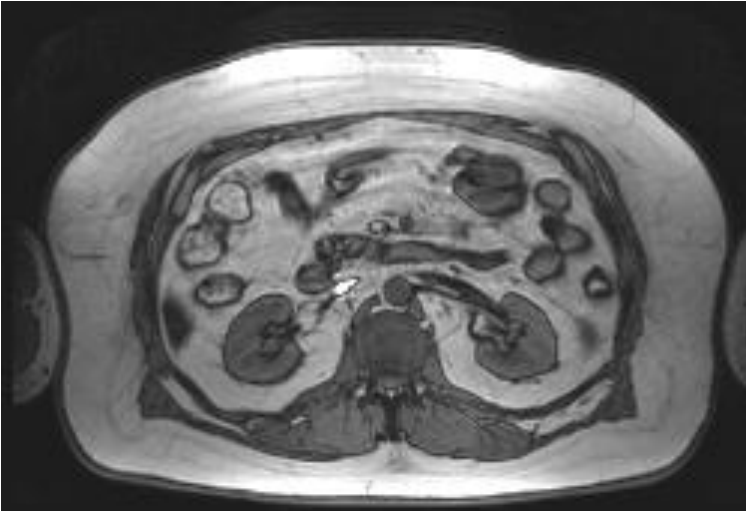

Patient #5 – a

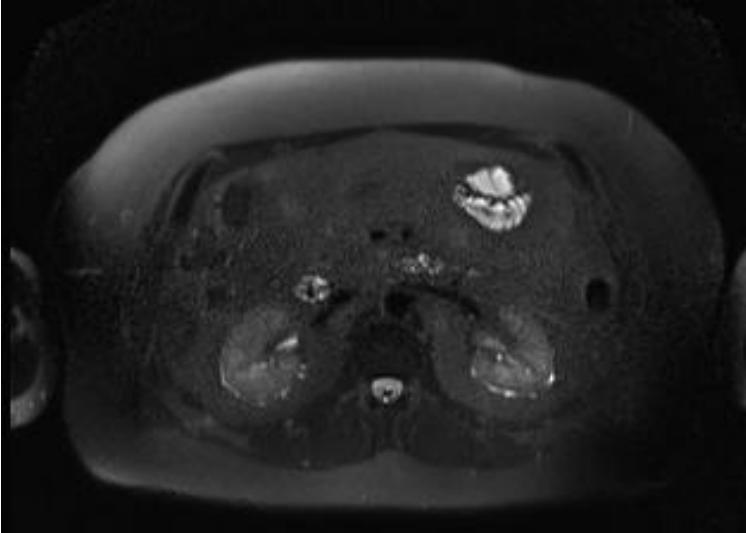

Patient #5 – b

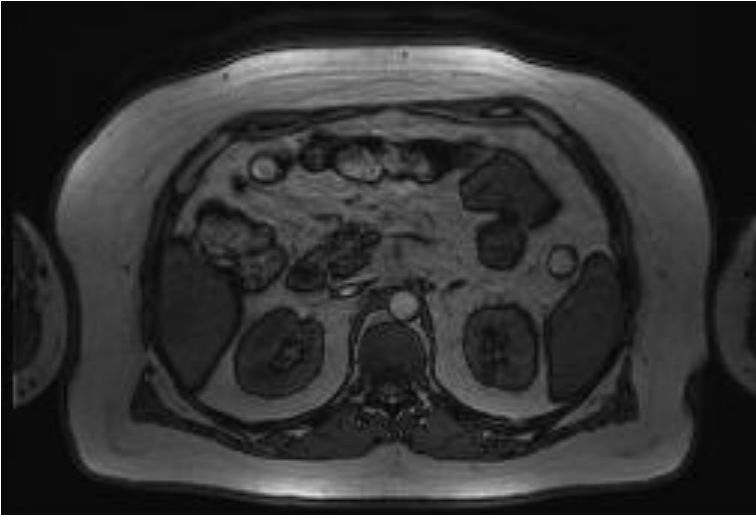

Patient #5 – c

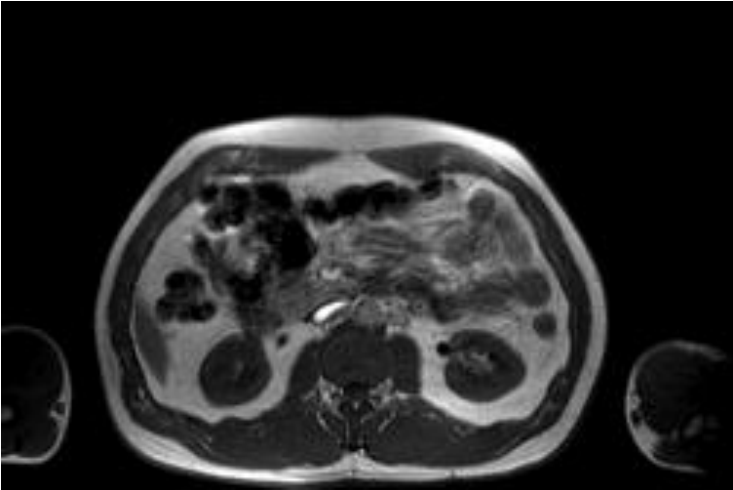

Patient #6 – a

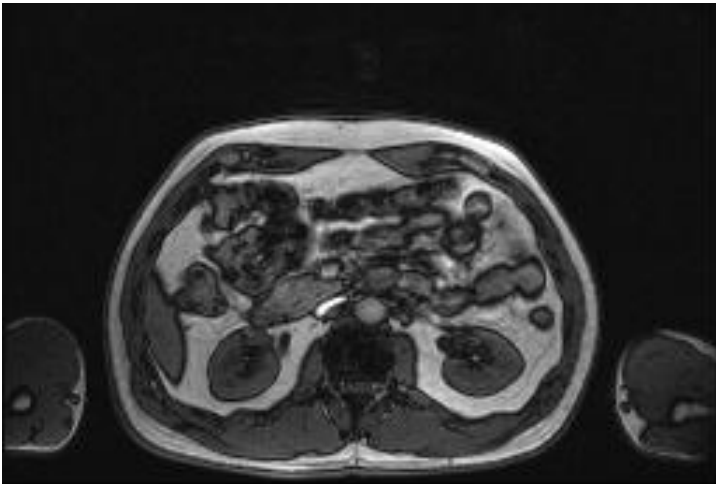

Patient #6 – b

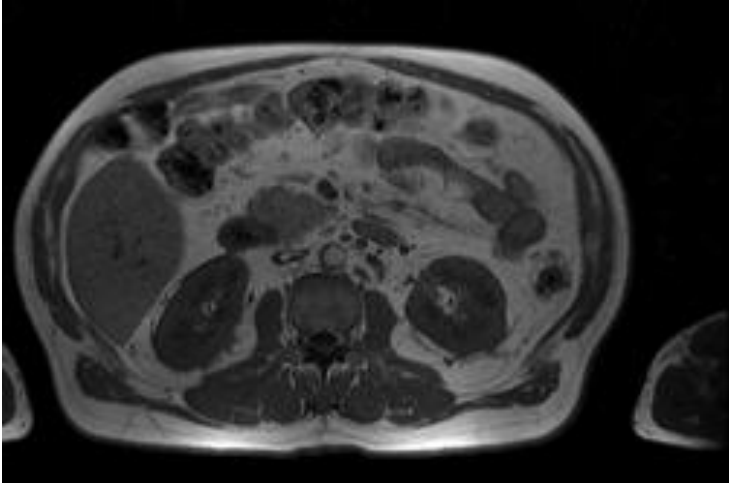

Patient #7

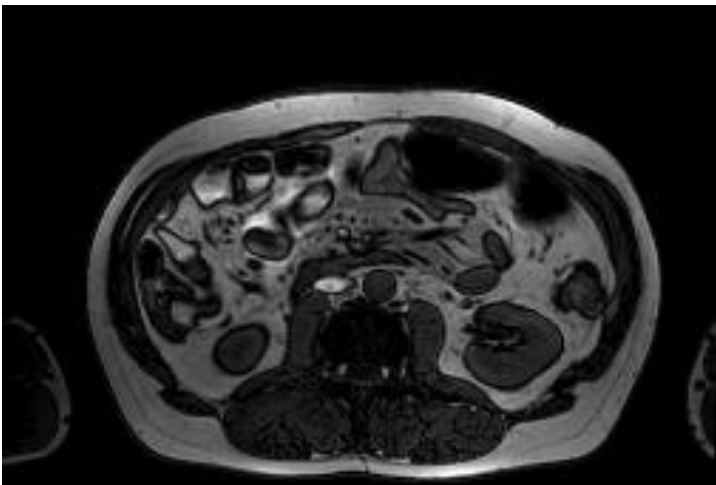

Patient #8

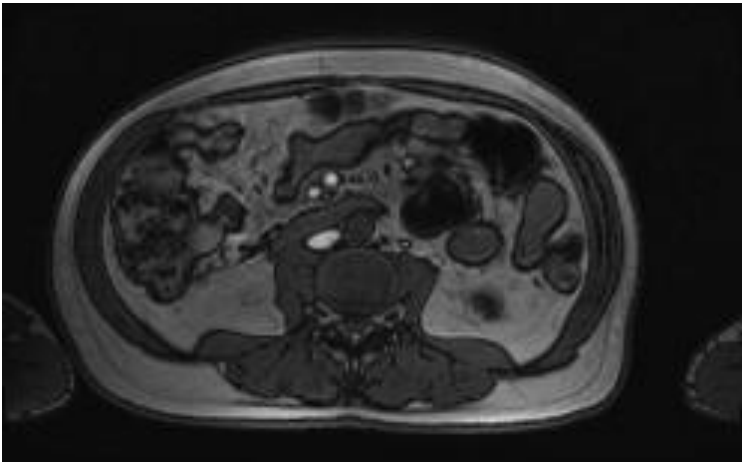

Patient #9
